# Supplementary material for: Dispersion matters: Diagnostics and control data computer simulation in Concealed Information Test studies
Source: PubMed Central journal article supplement (PMC7531802; doi:10.1371/journal.pone.0240259), 2020-10-02
Supplement: pone.0240259.s002.pdf [file pone.0240259.s002.pdf]

## S1 Appendix

### Classification Efficiency of Different Predictors on Study Level

The main question here was whether the effect between empirical liar and empirical control groups is affected by the different calculation versions of the predictor variable. Hence, predictor version was the main moderator to be tested in the following meta-analysis.

We chose a random-effects model rather than a fixed-effects model because a fixed-effects model assumes homogeneity in the estimated effect sizes. Since effect sizes are likely to be influenced by the many differences in study features among the studies included, it is unlikely that the assumption of homogeneity would be met in our case. However, since we have hypotheses on which features of the study would influence the effect, we included two further moderators in the meta-analysis – although neither is theoretically relevant to the present paper. First, most clearly, there are three different CIT protocols used in the studies: single-probe (SP) protocol, multiple-probe (MP) protocol, and single-probe protocol with familiarity-related filler items (SPF). (Note that there is only one study with single-probe protocol with filler items . While there is no minimal number of studies for conducting meta-analysis, this is of course very limited evidence. In any case, again, this question not relevant to the present paper.) These protocol differences have been repeatedly shown to significantly affect RT-CIT outcomes. Second, we included the potential moderator of using crowdsourced (online) experiment as opposed to laboratory experiments. While there are dozens of studies confirming the validity of crowdsourced experiments, there is also some evidence that effect sizes can be reduced or biased in certain cases. Furthermore, crowdsourced RT-CIT studies have been using less salient probe items than laboratory studies, which can also strongly affect outcomes. Consequently, it is also important to note that we do not aim to assess the validity of crowdsourced RT-CIT studies (which may be the subject of future research, using direct comparisons). This potential moderator merely represents the overall difference

26 between crowdsourced and laboratory RT-CIT studies as they have been conducted so far,  
27 including any accompanying design or settings.

28 Thus, we ran a random-effects model, with the following factors as potential  
29 moderators: Predictor (mean probe-irrelevant difference, standardized probe RT, and  
30 standardized probe-irrelevant difference), Protocol (SP, MP, SPF), Crowdsourcing (Yes vs.  
31 No); see Table 1-3. The random effects model indicated a meta-analytic effect of 1.57, 95%  
32 CI [1.23, 1.91]. The model showed a significant effect of the moderators  $Q_M(5) = 22.77$ ,  $p$   
33  $< .001$ . Nonetheless, the residual heterogeneity was still significant  $Q_E(30) = 106.55$ ,  $p < .001$ ,  
34 indicating that our moderators cannot fully explain all heterogeneity among the studies.

35 Both the Predictor and Protocol factors had more than two levels, therefore we first  
36 assessed if these factors were significant overall. Most importantly, the Predictor had no  
37 significant effect;  $Q_M(2) = 0.060$ ,  $p = .970$  (the nominal differences were, as compared to  
38 mean probe-irrelevant differences, larger for standardized probe RT, with regression  
39 coefficient  $B = 0.03$ , 95% CI [-0.28, 0.34]; smaller for standardized probe-irrelevant  
40 difference:  $B = -0.01$ , 95% CI [-0.32, 0.30]; these two compared to each other:  $B = 0.04$ ,  
41 95% CI [-0.27, 0.35].

42 Less importantly, the Protocol effect was significant as expected,  $Q_M(2) = 28.75$ ,  $p$   
43  $= .005$ . Pairwise follow-up comparisons showed that SPF had larger effects than SP;  $B = 0.86$ ,  
44 95% CI [0.31, 1.41],  $p = .002$ ; MP had also larger effect than SP,  $B = 0.44$ , 95% CI [0.09,  
45 0.78],  $p = .013$ ; and there was no significant difference between SPF and MP (despite a  
46 tendency for larger effect for SPF),  $B = 0.42$ , 95% CI [-0.07, 0.91],  $p = .094$ . The  
47 Crowdsourcing effect was also significant, with the expected smaller effects in crowdsourced  
48 studies,  $B = 0.51$ , 95% CI [0.17, 0.84],  $p = .003$ .

49 As a supplementary test for AUCs in specific, we compared the obtained AUC values  
50 across the three predictor versions in a one-way Welch corrected ANOVA. The test showed

51 no significant difference,  $F(2,22) = 0.49$ ,  $p = .617$ ,  $\eta_p^2 = .043$ , 90% CI [0, .173],  $\eta_G^2 < .001$ ,  
52  $BF_{01} = 3.85$ .

### 53 **Generalizability of Cutoff points and Related Classification Efficiency**

54 Since the between-condition effect size and the AUC (calculated between the same  
55 two conditions) are directly related, any increase in between-condition effect sizes necessarily  
56 indicates an increase in AUCs (except when the AUC cannot be further improved). However,  
57 unlike the AUC, effect size is not limited by ceiling effect, and therefore is an optimal  
58 measurement to compare different designs or predictors. For example, two methods compared  
59 in strictly controlled laboratory conditions may both yield AUCs around 98-100%, hence their  
60 difference will be neither statistically significant, nor apparently substantial. However, the  
61 effect sizes may differ significantly, which implies that under less optimal real-life conditions,  
62 the method with the larger effect size in the laboratory study may provide substantially higher  
63 AUC in field settings. That is why our meta-analytical comparison of effect sizes are not only  
64 valid, but, from this point of view, preferable to AUC comparisons.

65 However, from effect sizes alone the true positive and false positive rates at given  
66 cutoff values cannot be inferred. Therefore, for the evaluation of the generalizability of cutoff  
67 points, we cannot compare effect sizes, but instead directly compare the true positive rates  
68 (TPRs) and false positive rates (FPRs) obtained in the different conditions. For this, we used a  
69 leave-one-out cross-validation across the studies. First, we calculated the optimal thresholds  
70 (based on Youden's index) in all individual experimental designs for the liar and control  
71 group pairs, and, for each design, calculated TPRs and FPRs using the given design's optimal  
72 cutoff value. Afterwards, for each design, we calculated TPRs and FPRs using, as inferred  
73 cutoff points, the mean of the optimal cutoff values of all other designs.

74 Using the obtained TPRs and FPRs, we ran a three-way repeated measures ANOVA with  
75 factors Cutoff (Optimal vs. Inferred)  $\times$  Condition (TPR vs. FPR)  $\times$  Predictor (mean probe-

76 irrelevant difference, standardized probe RT, and standardized probe-irrelevant difference);  
 77 see Fig A1.

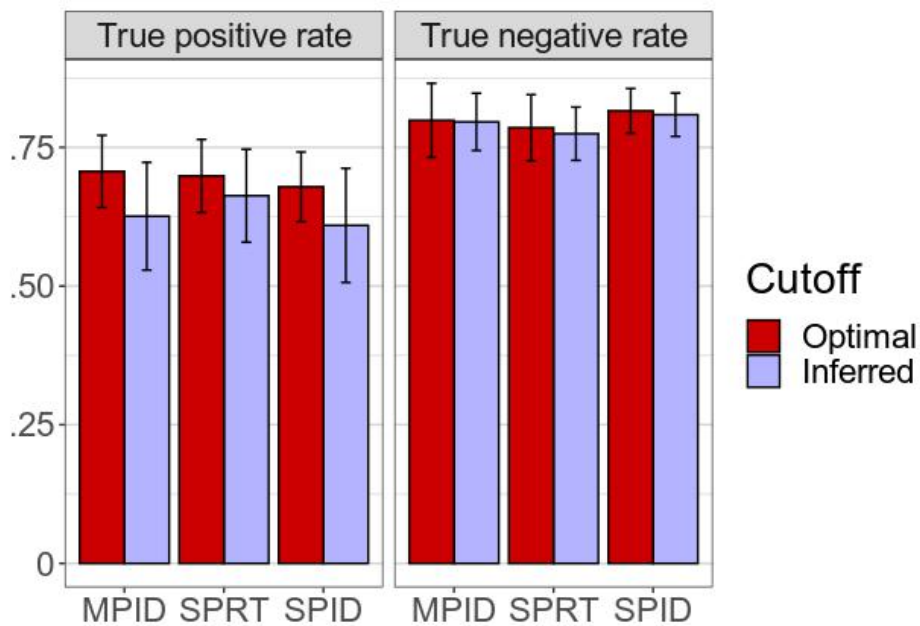

78 **Fig A1. True positive and true negative rates, with Optimal and Inferred cutoff points,**  
 79 **for the differently calculated Predictors.**

80 Means with 95% CIs in error bars. *MPID*: mean probe-irrelevant difference; *SPRT*:  
 81 standardized probe RT, and *SPID*: standardized probe-irrelevant difference.

82

83 The Cutoff main effect was significant, with larger accuracy rates for optimal cutoffs,  
 84  $F(1,11) = 48.49, p < .001, \eta_p^2 = .815, 90\% \text{ CI } [.546, .881], \eta_G^2 = .022, BF_{10} = 1.62$ . The  
 85 Predictor main effect was not significant,  $F(2,22) = 0.56, p = .580, \eta_p^2 = .048, 90\% \text{ CI }$   
 86  $[0, .184], \eta_G^2 < .001, BF_{01} = 14.00$ . The Predictor  $\times$  Cutoff and Predictor  $\times$  Condition  
 87 interactions were not significant;  $F(2,22) = 2.39, p = .115, \eta_p^2 = .178, 90\% \text{ CI } [0, .356], \eta_G^2$   
 88  $= .001, BF_{01} = 7.44; F(2,22) = 3.22, p = .060, \eta_p^2 = .226, 90\% \text{ CI } [0, .404], \eta_G^2 = .015, BF_{01} =$   
 89  $2.54$ ; nor was the three-way interaction of Predictor  $\times$  Condition  $\times$  Cutoff;  $F(2,22) = 0.54, p$   
 90  $= .593, \eta_p^2 = .046, 90\% \text{ CI } [0, .180], \eta_G^2 = .002, BF_{01} = 5.22$ . This means that the different  
 91 predictor calculations did not affect the outcome when using inferred cutoff points; hence,

92 neither of the predictor alternatives proved superior to the conventional mean probe-irrelevant  
93 difference.

94 Finally, the Condition main effect was significant;  $F(1,11) = 15.00, p = .003, \eta_p^2$   
95  $= .577, 90\% \text{ CI } [.179, .730], \eta_G^2 = .250, BF_{10} = 1.41 \times 10^{11}$ ; while the Condition  $\times$  Cutoff  
96 interaction was not significant;  $F(1,11) = 0.76, p = .403, \eta_p^2 = .064, 90\% \text{ CI } [0, .328], \eta_G^2$   
97  $= .014, BF_{01} = 1.12$ . This of course depends on how the inferred cutoff point is defined. For  
98 example, if we use medians instead of means in the cross-validation procedure, the inferred  
99 cutoffs will lead to somewhat higher TPRs and somewhat lower TNRs. Repeating an  
100 analogous ANOVA in this case, main results remain the same. (Cutoff:  $F(1,11) = 78.19, p$   
101  $< .001, \eta_p^2 = .877, 90\% \text{ CI } [.680, .920], \eta_G^2 = .026, BF_{10} = 2.87$ ; Condition:  $F(1,11) = 8.05, p$   
102  $= .016, \eta_p^2 = .423, 90\% \text{ CI } [.054, .629], \eta_G^2 = .144, BF_{10} = 1.32 \times 10^6$ ; Predictor:  $F(2,22) =$   
103  $0.84, p = .443, \eta_p^2 = .071, 90\% \text{ CI } [0, .224], \eta_G^2 < .001, BF_{01} = 14.18$ ; Condition  $\times$  Cutoff:  
104  $F(1,11) = 0.26, p = .622, \eta_p^2 = .023, 90\% \text{ CI } [0, .254], \eta_G^2 = .005, BF_{01} = 2.52$ ; Cutoff  $\times$   
105 Predictor:  $F(2,22) = 5.95, p = .009, \eta_p^2 = .351, 90\% \text{ CI } [.064, .515], \eta_G^2 = .002, BF_{01} = 7.44$ ;  
106 Condition  $\times$  Predictor:  $F(2,22) = 1.46, p = .254, \eta_p^2 = .117, 90\% \text{ CI } [0, .287], \eta_G^2 = .007, BF_{01}$   
107  $= 4.77$ ; Condition  $\times$  Cutoff  $\times$  Predictor:  $F(2,22) = 0.09, p = .915, \eta_p^2 = .008, 90\% \text{ CI } [0, .043],$   
108  $\eta_G^2 < .001, BF_{01} = 5.65$ .)

## 109 Discussion

110 We evaluated two RT-CIT predictor calculations as alternatives to the conventional  
111 mean probe-irrelevant difference, but did not find either of them to have a better classification  
112 efficiency or more generalizable cutoff points (i.e., optimal cutoff points found in one study  
113 do not work better in other studies and individual cases when using alternative predictor  
114 calculation). It is understandable and well proven that the variance of electrodermal responses  
115 differs substantially between individuals and therefore such response values need to be  
116 standardized per each test, but in case of simple response times this does not appear to be true,

117 at least for the purpose of CIT evaluations. Nonetheless, in individual cases the standardized  
118 probe-irrelevant difference may be informative for researchers less familiar with the RT-CIT  
119 but familiar with Cohen's *d*.

120 In our analyses we actually also explored slightly different variations of the two  
121 alternative predictors (all calculations available in the S2 File). For one, we calculated  
122 standardized probe RT using trial-level standardization (i.e., we standardized trial level probe  
123 and irrelevant RTs and then took the mean of standardized probe values), considering that this  
124 might more closely reflect the reasoning behind the use of standardization for the continuous  
125 electrodermal measure (i.e., trial level RTs are more continuous than RTs aggregated per  
126 items). For another, we calculated standardized probe-irrelevant difference using, as  
127 denominator, the SD from irrelevant trials only (instead of the pooled SD for the regular  
128 uncorrected Cohen's *d* as standardized mean difference), because this was the calculation  
129 used in certain papers [33,35] (but not by Noordraven and Verschuere [30] who originally  
130 introduced this measure as regular uncorrected Cohen's *d*). Both these variations led to very  
131 similar results as their more conventional counterpart (as presented above), and in fact both  
132 gave nominally slightly smaller effect sizes and AUCs.

133 We have furthermore demonstrated, for the first time, the generalizability of cutoff  
134 points in the RT-CIT. This is important in cases when immediate individual evaluation is  
135 given in any new scenario where there is no sufficient data yet for the calculation of an  
136 optimal cutoff in the given settings – which can be a new experiment where immediate  
137 individual feedback is needed (e.g., for reward), as well as in future potential real life  
138 application of the RT-CIT. Unsurprisingly, the accuracy rates decreased when using cutoff  
139 points inferred from other studies instead of using the optimal cutoff points for each given  
140 dataset. However, while statistically significant, this decrease was moderate, and reflected  
141 primarily in TPR difference only – a reassuring finding in view of the arguable priority of

142 TNR, reflecting the protection of innocent subjects, over TPR (see Table 2: TPR  $.71 \pm .11$  and  
143 TNR  $.80 \pm .12$  for optimal cutoff, while TPR  $.63 \pm .17$  and TNR  $.80 \pm .09$  for inferred cutoff, for  
144 the conventional mean probe-irrelevant difference predictor). This implies that the cutoff  
145 points are fairly generalizable, and individual evaluation in novel scenarios is not much less  
146 reliable than those determined using the receiver operating characteristics of a previous  
147 sample of liars and truth-tellers. The related statistics shown in Table 2 (along with those in  
148 Table 1 and Table 3) may serve as a useful future reference for RT-CIT researchers.

149           Altogether, we can conclude that the conventional mean probe-irrelevant difference is  
150 a good estimate of the effect and that generalizable cut off points can be found.
